1 **Title:** Robust generation of transgenic mice by simple hypotonic solution mediated delivery of  
2 transgene in testicular germ cells

3

4 **Running Title:** A shortcut method of transgenesis

5

6 **Authors:** Abul Usmani<sup>1,2,\$,#</sup>, Nirmalya Ganguli<sup>1,#</sup>, Subodh K Jain<sup>2</sup>, Nilanjana Ganguli<sup>1</sup>, Rajesh  
7 Kumar Sarkar<sup>1</sup>, Mayank Choubey<sup>1</sup>, Mansi Shukla<sup>1</sup>, Hironmoy Sarkar<sup>1</sup> and Subeer S  
8 Majumdar\*<sup>1</sup>

9

10 **Affiliations:**

11 1: Embryo Biotechnology Laboratory, National Institute of Immunology, New Delhi, India

12 2: Department of Zoology, Dr. H. S. Gour University, Sagar, M.P, India.

13

14 # Co-first authors

15 \$ Present address: Department of Genetics, Washington University School of Medicine, St.  
16 Louis, 63108, USA

17

18 \*Corresponding Author; E.mail: [subeer@nii.ac.in](mailto:subeer@nii.ac.in), Telephone: 91.11.26703751;

19 Fax: 91.11.26742125

20

21

22

23

24

25

26

27

28

29 **Abstract:**

30 Our ability to decipher gene sequences has increased enormously with the advent of modern  
31 sequencing tools but the ability to divulge functions of new genes have not increased  
32 correspondingly. This has caused a remarkable delay in functional interpretation of several  
33 newly found genes in tissue and age specific manner, limiting the pace of biological research.  
34 This is mainly due to lack of advancements in methodological tools for transgenesis.  
35 Predominantly practiced method of transgenesis by pronuclear DNA-microinjection is time  
36 consuming, tedious and requires highly skilled persons for embryo-manipulation. Testicular  
37 electroporation mediated transgenesis requires use of electric current to testis. To this end, we  
38 have now developed an innovative technique for making transgenic mice by giving hypotonic  
39 shock to male germ cells for the gene delivery. Desired transgene was suspended in hypotonic  
40 Tris-HCl solution (pH 7.0) and simply injected in testis. This resulted in internalization of the  
41 transgene in dividing germ-cells residing at basal compartment of tubules leading to its  
42 integration in native genome of mice. Such males generated transgenic progeny by natural  
43 mating. Several transgenic animals can be generated with minimum skill within short span of  
44 time by this easily adaptable novel technique.

45

46

47

48

49

50

51

52

53

54 **Introduction:**

55 Transgenesis is an indispensable technology in biomedical research as it allows to manipulate the  
56 genome of an organism at will, providing a platform for determining functions of various genes.  
57 With the advent of high throughput sequencing technologies, valuable information about several  
58 genes and their spatio temporal pattern of expression have been gathered. The technologies have  
59 also led to generation of a huge database of information about potential coding and non-coding  
60 regions of the genome that control development and maintenance of an organism<sup>1-3</sup>. However,  
61 studies of functional genomics are essential to decipher their roles and to understand how their  
62 altered expressions are correlated to physiology, development and diseases. Although several  
63 methods of germ line gene transfer are available to make transgenic animals for this purpose,  
64 they are tedious, time consuming and expensive. For instance, classical method of gene transfer  
65 involves microinjection of nucleic acids into fertilized eggs, typically yielding low success rate  
66 of about 10-20%<sup>4,5</sup>. Moreover, this technique is beyond reach of common researcher, largely  
67 due to technical complexities in adopting skills for micro manipulation of embryos<sup>4</sup>. This has  
68 caused a remarkable delay in functional interpretation of several newly found genes in tissue and  
69 age specific manner, limiting the pace of biological research. For meaningful interpretation of  
70 rapidly generating knowledge about genomics, it is imperative to establish a faster alternative to  
71 DNA microinjection mediated transgenesis which is easily adaptable, less invasive and less time  
72 consuming.

73 Alternative to above strenuous technique we had developed a method for generation of  
74 transgenic mice by directly injecting the desired gene in the testis followed by in vivo  
75 electroporation<sup>6</sup>. Since, this technique requires expertise in survival surgeries of animals, we  
76 next developed a two-step non-surgical electroporation procedure to generate transgenic mice<sup>7</sup>.

77 This technique is less complicated for small animal like mice but due to involvement of electric  
78 shock it may not be feasible for large animal transgenesis. Moreover, due to much variation in  
79 testis size and scrotal thickness the standardization of voltage parameters remains challenging.  
80 This led us to further develop an innovative and simple method to make transgenesis easy.

81 Treatment with hypotonic Tris-HCl solution result in reduced osmolarity and leads to hypotonic-  
82 swelling of germ cells which eventually kill them with increased hypotonicity<sup>8</sup> and this kind of  
83 hypotonic-swelling in erythrocyte lead to uptake of surrounding molecules such as nucleosides  
84 inside the cell<sup>9</sup>. We sought to exploit this property of the germ cell in testis, and hypothesized  
85 that a hypotonic Tris-HCl solution at certain hypotonic concentration might allow the germ cells  
86 to internalize the surrounding solutes like DNA *in vivo* without being killed and the sperm  
87 produced from transfected germ cells may carry desired DNA fragment (transgene) which can  
88 generate transgenic animal.

89 Motivated by the above hypothesis, and to circumvent the caveats resident in previous  
90 procedures, here we report the development of an easy and simple procedure for *in vivo* gene  
91 transfer in male germ cells of the testis for producing transgenic mice. Delivery of the transgene  
92 into germ cells was achieved by creating a hypotonic environment surrounding spermatogonia  
93 upon testicular injection of linearized transgene suspended in the hypotonic solution of Tris-HCl.

94 Such a procedure enabling researcher's to generate their own transgenic animals, instead of  
95 outsourcing, would drastically minimize the time required for studies of functional genomics and  
96 facilitate research involving humanized transgenic models of diseases.

97

98 **Results:**

99 ***Transfection of nucleotides in testis by Tris-HCl solution***

100 To test our hypothesis that hypotonicity generated through Tris-HCl solution can help to  
101 transfect testicular germ cells in vivo, TRITC labelled dUTP (RED-dUTP) molecules was taken  
102 as reporter initially. RED-dUTP suspended in Tris-HCl solution was injected into testis of 30  
103  $\pm 2$  days old male mice. Earlier it was reported by us that testis of 30  $\pm 2$  day old mice is suitable  
104 for testicular transgenesis<sup>6</sup>. Initially the concentration of Tris-HCl was maintained at 20mM as  
105 reported earlier for treatment to germ cells in vitro<sup>8</sup>. No presence of RED-dUTP was observed in  
106 the tubules when isolated from testis. We investigated the possibilities of transfection with higher  
107 concentration of Tris-HCl (50mM, 100mM and 150 mM concentrations) with suspended RED-  
108 dUTP. We observed the presence of Red-dUTP fluorescence in seminiferous tubules at 100mM  
109 and 150mM concentration, isolated from transfected testis (**Suplimentary Fig. 1a**).

110 ***Transgene transfection in testis by Tris-HCl solution***

111 When it was found that Tris-HCl solution can deliver the nucleotides into the testis, linearized  
112 pCX-Egfp plasmid DNA, having EGFP reporter under ubiquitous promoter, was taken for  
113 further validation. Variation in parameters were tried to achieve the best transfection in testis in  
114 vivo. Injection parameters such as amount of plasmid DNA (ranging from 10  $\mu$ g -30  $\mu$ g/testis),  
115 volume of injection (ranging from 20  $\mu$ l - 30  $\mu$ l), number of injections per testis (1-4) and the  
116 concentration of Tris-HCl (ranging from 20 mM to 200 mM) were tested. Based on EGFP  
117 expression after 30 days of post transfection in testis, the best transfection in our case was  
118 observed with injection conditions of 150 mM Tris-HCl, having 12.5  $\mu$ g of plasmid DNA in a  
119 total volume of 25  $\mu$ l, and two injection sites per testis of 30 $\pm 2$  days old male FVB mice

120 **(Suplimentary Fig 1b and Supplementary Table 1)**. In the cross-section of transfected testis,  
121 EGFP expression was observed in many tubules. The EGFP expression was also found to be  
122 germ cells specific, confirmed by co-localization with VASA, a germ cell marker **(Fig. 1a)**. In  
123 transfected tubules there are regions where transfected and non transfected germ cells can be  
124 observed **(Fig 1b)**. We observed no apparent adverse effect of Tris-HCl on transfected testicular  
125 tissue architecture **(Supplementary Fig 1c)**.

### 126 *Generation of transgenic mice mediated by Tris-HCl testis transfection*

127 Based on our preliminary observations of Tris-HCl mediated transfection of testicular germ cells,  
128 and stable expression of transgene even after 30 days of post transfection, we expected that the  
129 sperm produce from the transfected germ cells should carry the transgene and could be used for  
130 generation of transgenic mice.

131 Implementing this new method we have generated transgenic mice using *Bucsn2-IRES2-Egfp*  
132 construct, which contain *Egfp* reporter gene under Buffalo Beta-casien (*Bucsn2*) promoter,  
133 which expresses specifically in mammary epithelial cells. The linearized construct of *Bucsn2-*  
134 *IRES2-Egfp* was suspended in 150mM Tris- HCl and injected in the both testis of a mice (fore-  
135 founder) at the age of 30 $\pm$ 2 days. Fore-founders were cohabitated with wild type female mice 30  
136 days post transfection to obtain generation one (G1) progeny. The presence of transgenic pups in  
137 G1 was detected by PCR **(Fig. 2 a)**. Transgenic female mice were housed until adulthood and put  
138 for mating to make them lactating. In such transgenic female mice, an intense endogenous EGFP  
139 fluorescence was seen in their mammary glands during period of lactation **(Fig. 2b)**. The  
140 presence of EGFP was observed in the mammary tissue extract compared to wild type control,  
141 and no EGFP expression was found in other tissue types of the same transgenic female mice

142 **(Fig. 2c)**. To evaluate whether the transgene in G1 can be carried forward to the next generation  
143 that is G2, transgene positive adult male and female mice from G1 were put for mating. PCR  
144 screening showed transgene positive G2 progeny indicating that the transgene was propagated to  
145 G2 **(Fig. 2a)**.

146 To further validate this newly developed method of transgenesis, we used two more constructs  
147 *Amh-IRES2-Egfp* and FetuinA-shRNA for generation of transgenic mice.

148 *Amh-IRES2-Egfp* construct carried *Egfp* under promoter of anti-mullerian hormone (*AMH*)  
149 which is known to be expressed specifically in infant Sertoli cells. By PCR analysis transgene  
150 positive animals were detected in G1 **(Fig. 3a)**. Southern blot analysis were performed to  
151 determine transgene integration sites in the genome, and it was found that in this transgenic mice  
152 line, there were mostly two types of integration of the delivered transgene in the genome. One is  
153 integration in tandem repeats which generated ~5.3kb band in southern blot and another is single  
154 copy integration for which a band at ~4kb was observed in the same **(Fig. 3b)**. Immuno-  
155 histochemical analysis showed Sertoli cell specific expression of EGFP in the testis of 5days old  
156 transgenic mice **(Fig. 3c)** and there was an absence of EGFP expression in the other tissues of the  
157 same transgenic mice **(Supplementary Fig. 2a)**. As the AMH promoter is infant Sertoli cell  
158 specific, no EGFP expression was observed in testis at 42 days (post-pubertal) of age  
159 **(Supplementary Fig. 2b)**. Western blot analysis with testicular extracts of 5 days old transgenic  
160 mice from G1 revealed presence of 28 KDa band corresponding to EGFP **(Fig. 3d)**.

161 In the construct FetuinA-shRNA, shRNA specific to *Fetuin A* was cloned under ubiquitous  
162 promoter U6. The transgenic progeny born in G1—from the fore founders transfected with this  
163 construct were screened by slot blot analysis **(Fig 4a)** but not with the usual PCR analysis, as in

164 our case the PCR primer did not worked nicely on shRNA may be due to their stable hairpin loop  
165 structure. Quantitative Realtime PCR analysis of mRNA extracted from liver tissue revealed that  
166 expression levels of Fetuin-A mRNA was drastically reduced in transgenic mice as compared to  
167 that in wild type mice (**Fig. 4b**). Von kossa staining of liver and heart tissue from knockdown  
168 mice revealed increased calcification of tissues, unlike wild type tissues (**Fig. 4c**).

169 There were 12 out of 17, 8 out of 25, and 16 out of 36 transgene positive animals as judged by  
170 genomic analysis of progeny born in G1 generation of *Bucsn2-IRES2-Egfp*, *Amh-IRES2-Egfp*,  
171 and FetuinA-shRNA transgenic mice, respectively. Hence for this newly developed transgenesis  
172 technique, the overall efficiency to transmit a transgene in the first generation was found to be 48  
173 % (**Supplementary Table 2**).

174

## 175 **Discussion:**

176 Development of a user-friendly method for rapidly generating transgenic mice without  
177 extraordinary laboratory set up is a major unmet need of biomedical researchers. Rapidly  
178 generating outflow from modern DNA sequencing technologies has made this need more crucial.  
179 To this end, we have developed a technique for making mice which involves simple testicular  
180 injection of transgene suspended in hypotonic solution of 150mM Tris-HCl.

181 Hypotonic solution of 20mM Tris-HCl is usually used to damage and remove the contaminating  
182 germ cells from cultures of primary Sertoli cells of testicular origin<sup>8,10</sup>. A treatment with  
183 hypotonic solution of 5mM to 20 mM Tris-HCl for 2.5 minutes results into hypotonic-swelling  
184 of germ cells<sup>8</sup>. The higher concentration of Tris-HCl (30mM to 80 mM ) was inefficient in



185 harming the germ cells<sup>8</sup>. In another study with erythrocytes, hypotonic-swelling led to uptake of  
186 surrounding nucleosides, amino acids, and monosaccharides via non-conventional Na<sup>+</sup>-  
187 independent pathway<sup>9</sup>. This non-conventional path way suggested to be non-specific for uptake  
188 of molecules inside the cells<sup>9</sup>. Here, in this study, we have exploited this cellular response  
189 towards hypotonocity and found that hypotonic solution containing Tris-HCl at a concentration  
190 of 150mM effectively transfected DNA in testicular germ cells while they being remained  
191 healthy. In the process of spermatogenesis, drastic division of testicular germ cells occur with  
192 multiple mitotic divisions in the initial phases. In this dividing process genome of the germ cell  
193 goes through multiple synthesis phase leading to frequent unwinding of the DNA strands,  
194 making it vulnerable for integration and propagation of exogenous DNA fragments, if delivered  
195 in to the germ cells. Though there was a chance that other cell types of the testis might also  
196 respond to this induced hypotonicity and uptake the delivered transgene, we did not find the  
197 EGFP expression in to any other testicular cell type. The hypotonic effect of Tris-HCl does not  
198 harm the testis because it gets easily cleared along with the interstitial fluid which has a high  
199 turnover rate in the testis<sup>11</sup>.

200 To determine whether such transfection by hypotonic solution can lead to generation of  
201 transgenic animal, we have taken two tissue-specific over expression constructs, namely *Bucsn2-*  
202 *IREs2-Egfp* and *Amh-Ires2-Egfp*, and a knock down construct, U6-shRNA against Fetuin A  
203 gene. We successfully generated transgenic progeny by this new method from all the three  
204 constructs used in the study. In case of transgenic lactating females carrying *Bucsn2-IREs2-Egfp*  
205 transgene, very intense expression of EGFP was observed specifically in the mammary glands.  
206 The transgene (*Bucsn2-IREs2-Egfp*) also propagated from generation one (G1) to generation two  
207 (G2), further confirming its stable integration in the genome. The results were found to be

208 similar to our previous report where same construct was used to generate transgenic animals but  
209 by electroporation method<sup>12</sup>. In *Amh-Ires2-Egfp* transgenic line, *Egfp* gene was under regulation  
210 of murine *Amh* promoter. *Amh* is expressed at very high levels in immature Sertoli cells of the  
211 testis from 12.5 day post coitum (dpc) in the mouse<sup>13</sup> until the onset of testicular puberty<sup>14</sup>  
212 (around 10 days of postnatal age). In transgenic mice carrying *Amh-Ires2-Egfp*, we could  
213 successfully detect the pattern of gene integrations in the genome by Southern blot analysis. Age  
214 specific expression of EGFP under control of *Amh* promoter in the Sertoli cells of 5 days old  
215 mice suggested successful expression of the integrated gene. This was further authenticated by  
216 Western blot analysis, which showed the presence EGFP in the testicular extracts from 5 days  
217 old transgenic mice but not in the extracts of testis from age matched wild type mice.

218 We have also evaluated the utility of this method in exerting RNA inhibition *in vivo*. Gene  
219 knockdown mice was generated using a construct carrying shRNA against mRNA of Fetuin-A, a  
220 protein predominantly produced by the liver. Such mice displayed a significant ( $p<0.05$ ) decline  
221 in the levels of Fetuin-A mRNA in the liver, suggesting successful generation of knockdown  
222 mice by this procedure. Fetuin-A is a major inhibitor of calcification in soft tissues, especially  
223 that of heart, kidney and lung. Deficiency of Fetuin-A is known to be associated with dystrophic  
224 calcification of these tissues<sup>15</sup>. We found similar calcification in hepatic and cardiac tissue of our  
225 Fetuin-A knock-down mice generated by this procedure. This observation is in line with previous  
226 findings reported in Fetuin A knock-out mice generated using embryonic stem (ES) cells<sup>15</sup>.

227 The percentage of efficiency for getting a transgene positive animal was found to be about 48 %  
228 by this method, which was higher than the conventional method of transgenesis by pronuclear  
229 DNA injection method 10-20%<sup>4,5</sup>, but lower than the earlier method which used gene

230 electroporation in the testis<sup>7</sup>. Considering the simplicity of this hypotonic solution mediated  
231 transgenic method which requires no additional instruments and specific skills, we believe that  
232 this efficiency is quite sufficient to generate an adequate number of transgenic founder animals  
233 each of which can generate a line for any given biological study. Moreover, this innovative  
234 method can be extrapolated in large animals species like non-human primates and bovine where  
235 the generation of transgenic animal with the existing techniques are very cumbersome.

236 In conclusion, we have developed a novel and simple method for making transgenic mice  
237 avoiding any harsh treatment to animals. This procedure is fast and can be easily adapted by  
238 researchers since it does not require any dedicated laboratory, equipment or specialized expertise  
239 to handle embryos. Moreover, it does not involve sacrifice of any animal or use of electric pulses  
240 for testicular gene transfer making this technique ethically more acceptable. This easy procedure  
241 of *in-vivo* transgenesis by simple injection of a suspension of DNA in the testis provides a  
242 remarkable scope to biomedical researchers for generating their own transgenic animal models  
243 thereby potentially adding pace to the field of functional genomics.

244

## 245 **Materials and Methods**

### 246 **Animals:**

247 FVB/J strain of mice was used for the present study. The mice were housed in a climate controlled  
248 environment under standard light (14 hour light, 10 hour dark cycle), temperature ( $23 \pm 1$  °C),  
249 and humidity ( $50 \pm 5\%$ ). Animals were used as per the National Guidelines provided by the  
250 Committee for the Purpose of Control and Supervision of the Experiments on Animals

251 (CPCSEA), Govt. Of India. Protocols for the experiments were approved by the Institutional  
252 Animal Ethics Committee (IAEC), National Institute of Immunology, New Delhi.

253 **Plasmids:**

254 *pCX-Egfp* plasmid was a kind gift from Dr. Y. Junming (University of Tennessee, Memphis,  
255 USA), it contains chicken beta actin promoter along with cytomegalovirus transcription enhancer  
256 element (CX) and an *egfp* gene. The plasmid was digested with *Sal I* restriction enzyme to obtain  
257 a single fragment of 5.5kb which was used for the testicular injection during standardization of the  
258 procedure (**Supplementary Fig. 3a**).

259 *Amh-IRES2-Egfp* For this construct, 632bp upstream region of the anti mullerian hormone (Amh)  
260 gene spanning from -1bp to -632bp from transcription start site of mouse Amh gene was PCR  
261 amplified from mouse genome and cloned in *pIRES2-Egfp* vector to generate *Amh-IRES2-Egfp*  
262 construct. *Amh-IRES2-Egfp* plasmid DNA was digested with *AseI* and *NheI* restriction enzymes,  
263 the fragment of interest (5.3kb) had Amh promoter at 5' end and *egfp* gene towards the 3' end  
264 (**Supplementary Fig. 3b**).

265 *Bucsn2-IRES2-Egfp*: This construct expresses *egfp* gene under Buffalo beta casein promoter<sup>12</sup>.  
266 *Bucsn2-IRES2-Egfp* plasmid DNA was digested with *PstI* and *SfoI* restriction enzymes. The  
267 fragment of interest (~6.8kb) had BuCSN2 promoter at 5' end and *egfp* gene towards the 3' end  
268 (**Supplementary Fig. 3c**).

269 *Fetuin-A* -shRNA construct: *Fetuin-A* shRNA bacterial clones targeting mouse *Fetuin-A* gene  
270 were procured from Sigma-Aldrich, USA. The shRNA sequence was cloned in pLKO.1-puro  
271 vector<sup>16</sup> (Stewart, 2003) between U6 promoter (RNA polymerase III promoter) and central

272 polypurine tract (cPPT). *Fetuin*-AshRNA plasmid DNA was linearized with *Nco*I restriction  
273 enzyme to obtain 7.1 kb fragment, which was used to make transgenic mice  
274 **(Supplementary Fig. 3d)**.

#### 275 **Preparation of plasmid DNA:**

276 Plasmid DNA was isolated from overnight grown culture of *E. coli* (dh5 $\alpha$ ) using plasmid DNA  
277 isolation kit (Advanced Micro devices, India) and assessed for quality and quantity of DNA was  
278 assessed spectrophotometrically. Samples were checked on 1% agarose gel to check for integrity.  
279 Plasmid DNA was digested by appropriate restriction enzymes to take out the functional cassette  
280 and were purified by gel extraction kit (Qiagen, USA). Purified DNA was also assessed  
281 spectrophotometrically and on agarose gel, before injection in to testis.

#### 282 **Labelled nucleoside RED-dUTP transfection in to testis:**

283 Seminiferous tubules of the 30 days old FVB mice testis were injected with dUTP nucleotide  
284 (fluorophore labelled) suspended in different concentration of Tris-HCl hypotonic solution (50  
285 mM, 100 mM, and 150 mM) of pH 7.0. After 2 hours, testis were dissected out and teased to  
286 expose the tubules out of the tunica albuginea. Tubules were washed thrice with Phosphate  
287 buffered saline (PBS) and observed under u.v. for the presence of fluorescence inside the  
288 seminiferous tubules.

#### 289 **Hypotonic solution mediated *in vivo* gene transfer in testicular germ cells**

290 Male mice (30 $\pm$ 2 days post birth) were anesthetized using intra-peritoneal injection (~120  $\mu$ l) of  
291 amixtureof ketamine (45mg/kg) and xylazine (8mg/kg). Hair from scrotal area were trimmed,  
292 followed by disinfection with Betadiene. The area was rinsed after 2 minutes with 70% alcohol,  
293 leaving the area clean and moist. Gently, testis were pushed down from abdominal cavity with

294 the help of thumb and index finger. Plasmid DNA suspended in Tris-HCl solution  
295 (concentrations ranging from 20mM to 200mM during standardization) of pH 7.0, along with  
296 0.04% Trypan blue and was injected slowly in to the descended testis using 26 guage 10 $\mu$ l  
297 volume Hamilton syringe (701N; Hamilton Bonaduz AG, Switzerland). For standardization, a  
298 range of 20-30 $\mu$ l of hypotonic solution containing various concentration of linearized plasmid  
299 DNA (0.5-1.5 $\mu$ g/ $\mu$ l) was delivered into single testis. Variation in the concentration of Tris-HCl  
300 solution, concentration of plasmid DNA and number of injection sites (1-4) were done at the  
301 time of standardization of this technique (**Supplementary Fig. 4**).

### 302 **Generation and screening of transgenic lines**

303 Two constructs for over-expression and one construct for downregulation by shRNA were used  
304 for development and validation of this new procedure. The injected mice (fore-founders) were put  
305 for natural mating with wild type adult females after 30-35 days post-injection (mice age 60-65  
306 days) and genomic DNA of progeny were analyzed for the presence of transgene. For this  
307 purpose, tail biopsies were obtained at 21 days of age and genomic DNA of mice was extracted  
308 from respective tissue. Presence of transgene in the genomic DNA was determined by PCR using  
309 transgene-specific primers (**Supplementary Table 3**). PCR was performed using the standard  
310 protocol (Sambrook and Russell, 2001). The PCR products were analyzed by TAE agarose gel  
311 electrophoresis. To rule out the possibility of false positives in the PCR, negative controls such  
312 as a reaction with the gDNA of the wild-type (FVB/J) mice, were performed. For positive  
313 control, a reaction was performed using 20ng of pBuCSN2-IRES2-EGFP plasmid DNA.

314 Genomic DNA of pups were also analyzed for gene integration by Slot blot analysis for  
315 transgene constructs bearing shRNA. In brief, probe identifying the transgene fragment was

316 generated by  $\alpha P^{32}$ dCTP using High Prime DNA labeling kit (Roche Diagnostic GmbH,  
317 Mannheim, Germany). Denatured gDNA (1  $\mu$ g) was blotted on Hybond N<sup>+</sup> (Amersham  
318 Pharmacia Biotech, England) membrane with slot blot apparatus (Clever Scientific,  
319 Warwickshire, UK) under vacuum. The membranes were pre-hybridized for 4hours, followed by  
320 hybridization with respective transgene specific probes for 10-12 hours. The hybridized blot was  
321 exposed to Kodak BioMax MR Film (Kodak, Rochester, New York, USA) for detection of  
322 signals by autoradiography.

### 323 **Southern blot analysis**

324 Southern blot analysis was performed following standard procedure<sup>17</sup>. Ten micrograms of  
325 genomic DNA obtained from transgenic progenyof G1 generation was digested with BamHI  
326 restriction endonuclease. Digested product was resolved on 1% agarose gel, and transferred to  
327 Hybond N+ (GE Healthcare, England). An *Egfp* probe fragment of ~600bpwas labelled with  
328  $\alpha P^{32}$ dCTP using High Prime DNA labeling kit (Roche Diagnostic GmbH, Mannheim, Germany)  
329 and was used to detect the transgene integrations. The membrane was hybridized for 20 hours  
330 and was exposed to Kodak BioMax MS film (Kodak, Rochester, New York, USA) for detection  
331 of signals by autoradiography.

### 332 **Histology and Immuno-histochemistry**

333 For histology, tissues were dissected, fixed in formalin and processed for paraffin embedding.  
334 Sections were stained by hematoxylin and eosin or with Vonkossa stain. We determined the  
335 expression of EGFP in the seminiferous tubule of *pCX-Egfp* and *Amh-IRES2-Egfp* transgenic  
336 mice by immuno-histochemistry. Testis sections of 5 $\mu$ m were subjected to immunostaining with  
337 mouse anti-GFP (Clontech, Mountain View, CA, USA) as primary antibody at a dilution of

338 1:200 and then anti mouseIgG tagged to alexafluor 488 (Molecular probes, Eugene, OR, USA)  
339 was used at a dilution of 1:250, as secondary antibody. The fluorescence was detected by Nikon  
340 Eclipse Ti inverted fluorescence microscope (Nikon Corporation, Chiyoda-ku, Tokyo, Japan).  
341 The images were captured using Nikon-digital sight DS-Ri1 camera.

#### 342 **Western blot analysis**

343 Tissue lysates from testis of *Amh-IRES2-Egfp* transgenic mice; mammary gland, liver, spleen,  
344 brain, heart and kidney of *Bucsn2-IRES2-Egfp* transgenic mice were used to determine presence  
345 of EGFP. 30µg of protein sample was resolved on 12% SDS-PAGE and transferred to PVDF  
346 membranes (MDI, India). The membranes were first incubated with primary antibody (mouse  
347 anti-GFP) at 1:1000 dilutions followed by anti-mouse secondary antibody conjugated with  
348 horseradish peroxidase at 1:5000 dilutions. The protein bands were detected using enhanced  
349 chemiluminescence method (ECL, Amersham Biosciences, UK).

#### 350 **RNA isolation and Real-Time PCR**

351 RNA was isolated from liver tissue of *Fetuin-A* knockdown transgenic mice and wild type mice  
352 using TRIzol (Sigma Chemical Co., USA). Real time PCR was performed using primer specific  
353 for Fetuin-A gene (**5'TCACAGATCCAGCCAAATGC3'** as forward primer and  
354 **5'GGAATAACTTGCAGGCCACT3'** as reverse Primer). RNA (1µg) was treated with DNase I  
355 (1 unit; Fermentas, Pittsburgh, PA, USA) for 30 minutes at 37°C. Reaction was terminated by  
356 adding 1µl of 25 mM EDTA and incubating at 65°C for 10 minutes. DNaseI treated RNA was  
357 reverse transcribed using Reverse Transcription System (Eurogentec, Seraing, Belgium) with  
358 MuMLV reverse transcriptase enzyme and oligo-dT (15mer) for the single-strand cDNA  
359 synthesis. Real time PCR amplifications were performed in the Realplex (Eppendorf, Hamburg,



360 Germany) in a total volume of 10 $\mu$ l, which included 1 $\mu$ l of cDNA, 5 $\mu$ l of Power SYBR Green  
361 Master Mix (Applied Biosystems, CA, USA) and 0.5 $\mu$ l of each primer. Expression of GAPDH  
362 [using 5'AGAACATCATCCCTGCATCC 3' as forward primer and  
363 5'CACATTGGGGGTAGGAACAC3' as reverse Primer] was analyzed for use as an endogenous  
364 housekeeping gene control. Relative fold change of Fetuin-A mRNA in transgenic animal with  
365 respect to wild type mice was calculated by  $2^{\Delta\Delta ct}$  method<sup>18</sup>.

366

367

#### 368 **Competing Interests:**

369 The authors declare that they have no competing interests.

#### 370 **Author Contribution:**

371 The first and second authors contributed equally to this work. The experiments were conceived  
372 and designed by SSM and AU. Experiments were performed by AU, NG1 (Nirmalya Ganguli),  
373 NG2 (Nilanjana Ganguli), RS, MC, HS, MS. The data presented in the manuscript were analysed  
374 by all authors. The manuscript was written by AU, NG1 and SSM.

#### 375 **Acknowledgement**

376 We are grateful to the Director of National Institute of Immunology, for her support. We  
377 acknowledge the financial support provided by Department of Biotechnology, Govt. of India,  
378 under grants BT/PR11313/AAQ/01/376/2008 and BT/HRD/35/01/01/2010. We are grateful Dr.  
379 Y. Junming for providing pCX-EGFP plasmid. We greatly acknowledge the technical support  
380 from Birendra N. Roy, Dharamveer and Ram Singh. We acknowledge the help from staff of  
381 Small Animal Facility of National Institute of Immunology.

382

383

384 **References:**

- 385 1. Zhang W, Morris QD, Chang R, Shai O, Bakowski MA, Mitsakakis N, et al. (2004) The  
386 functional landscape of mouse gene expression. *J Biol.* 3:21. doi: 10.1186/jbiol16
- 387 2. Metzker ML. (2010) Sequencing technologies - the next generation. *Nat Rev Genet.* 11:31–46.  
388 doi: 10.1038/nrg2626.
- 389 3. Mutz K-O, Heilkenbrinker A, Lönne M, Walter J-G, Stahl F. (2013) Transcriptome analysis  
390 using next-generation sequencing. *Curr Opin Biotechnol.* 24:22–30.  
391 doi:10.1016/j.copbio.2012.09.004
- 392 4. Wall RJ. (2001) Pronuclear microinjection. *Cloning Stem Cells.* 3:209–20.  
393 doi:10.1089/15362300152725936
- 394 5. Rüllicke, T., Hübscher, U. (2000). Germ line transformation of mammals by pronuclear  
395 microinjection. *Exp. Physiol.* 85, 589–601. PMID: 11187955
- 396 6. Dhup S, Majumdar SS. (2008) Transgenesis via permanent integration of genes in  
397 repopulating spermatogonial cells in vivo. *Nat Methods.* 5:601–3. doi:10.1038/nmeth.1225
- 398 7. Usmani A, Ganguli N, Sarkar H, Dhup S, Batta SR, Vimal M, et al. (2013) A non-surgical  
399 approach for male germ cell mediated gene transmission through transgenesis. *Sci Rep.*  
400 3:3430. doi:10.1038/srep03430
- 401 8. Galdieri M, Ziparo E, Palombi F, Russo M.A, Stefanini M. (1981) Pure Sertoli cell cultures: A  
402 new model for the study of Somatic-Germ cell interaction. *J Androl.* 5, 249-254.  
403 doi:10.1002/j.1939-4640.1981.tb00625.x
- 404 9. Kirk K, Ellory JC, Young JD. (1992) Transport of organic substrates via a volume-activated  
405 channel. *J Biol Chem.* 267(33):23475-8. PMID: 1385424
- 406 10. Bhattacharya I, Gautam M, Sarkar H, Shukla M, Majumdar SS. (2016) Advantages of  
407 pulsatile hormone treatment for assessing hormone induced gene expression by cultured rat  
408 Sertoli cells. *Cell Tissue Res*; Epub ahead of print. doi: 10.1007/s00441-016-2410-1
- 409 11. Setchell BP. (1986) The Movement of Fluids and Substances in the Testis. *Aust J Biol*  
410 *Sci.*;39(2):193-207. PMID: 3539077
- 411 12. Ganguli N, Ganguli N, Usmani A, Majumdar SS. (2015) Isolation and functional  
412 characterization of buffalo (*Bubalus bubalis*)  $\beta$ -casein promoter for driving mammary  
413 epithelial cell-specific gene expression. *J Biotechnol.* 198:53–9.  
414 doi:10.1016/j.jbiotec.2015.02.001

- 415 13. Munsterberg A, Lovell-Badge R. (1991) Expression of the mouse anti-mullerian hormone  
416 gene suggests a role in both male and female sexual differentiation. *Development*.113:613–  
417 624. PMID: 1782869
- 418 14. Beau C, Rauch M, Joulin V, Jégou B, Guerrier D. (2000) GATA-1 is a potential repressor of  
419 anti-Müllerian hormone expression during the establishment of puberty in the mouse. *Mol*  
420 *Reprod Dev*. 56:124–38. PMID: 10813843
- 421 15. Merx MW, Schäfer C, Westenfeld R, Brandenburg V, Hidajat S, Weber C et al.(2005)  
422 Myocardial stiffness, cardiac remodeling, and diastolic dysfunction in calcification-prone  
423 fetuin-A-deficient mice. *J Am Soc Nephrol*. 16:3357–64. PMID: 16177000
- 424 16. Stewart SA. (2003) Lentivirus-delivered stable gene silencing by RNAi in primary cells.  
425 *RNA*. 9:493–501. doi:10.1261/rna.2192803
- 426 17. Southern EM. (1975) Detection of specific sequences among DNA fragments separated by  
427 gel electrophoresis. *J Mol Biol*. 98:503–517. doi:10.1016/S0022-2836(75)80083-0
- 428 18. Schmittgen TD, Livak KJ. (2008) Analyzing real-time PCR data by the comparative CT  
429 method. *Nat Protoc*. 3:1101–1108. doi:10.1038/nprot.2008.73.

430

431

432

433

434

435

## 436 **Figure Legends:**

### 437 **Fig. 1 Transfection of transgene in the testis by hypotonic solution**

438 **a)** EGFP expression in transfected testis transfected with pCX-EGFP suspended in 150mM Tris-  
439 HCl. i - v: Tissue Section of non-transfected testis. vi – x: Tissue section of transfected testis.  
440 EGFP expression was observed mostly in germ cells (yellow arrow head) of transfected testis.  
441 Lack of EGFP expression in non-transfected tubules and germ cells of treated testis (red arrow  
442 head). Note: Non-specific signal (white head) in the interstitial space of the testis was observed  
443 in both treated and wildtype animal's tissue section. Scale bar: 50  $\mu$ m.

444 **b)** Seminiferous tubule showing EGFP in germ cells at higher magnification of section figure - a  
445 x. Scale bar: 50  $\mu$ m

446

447 **Fig. 2 Generation of transgenic animal with *Bucsn2-IRES2-Egfp* construct**

448 **a)** PCR genotyping of the offspring from generation one (G1) and generation two (G2) to detect  
449 transgenic animal.

450 **b)** Mammary gland of lactating (day 7 of lactation) transgenic female mice (TBc 7) carrying  
451 *Bucsn2-IRES2-Egfp* transgene, as observed under stereozoom fluorescence microscope. Image  
452 (i) show the EGFP fluorescence specifically in mammary gland. Image (iii) show no EGFP  
453 fluorescence in gland of wild type mice. Image (ii) and (iv): corresponding phase contrast image.

454 **c)** Expression of GFP by western blot in protein from i) mammary glands of three different  
455 transgenic females and two different wild type mice and ii) various tissues (liver, spleen, brain,  
456 heart, mammary gland & kidney) of lactating (day 7 of lactation) transgenic female mice (TBc 7)  
457 carrying *Bucsn2-IRES2-Egfp* transgene GFP expression (~28 kDa) was observed in transgenic  
458 mice whereas there is no GFP signal in wild type mice. GFP expression (~28 kDa) was present  
459 only in mammary gland sample and not in other tissue type of the animal.  $\beta$ -actin was used as  
460 loading control.

461

462 **Fig. 3. Validation of *Amh-Ires2-Egfp* transgenic mice.**

463 **a)** PCR genotyping of the offspring using genomic DNA (gDNA) obtained from fore founder  
464 MG 1 & MG 2 transfected with *Amh-IRES2-Egfp*. MG 1 & MG 2 were mated with wild type  
465 female mice. MG denotes the forefounder animal of *Amh-IRES2-Egfp*. MT denotes transgenic  
466 animal of *Amh-IRES2-Egfp* line. Wt denotes wild type mice. NT denotes no template. +ve  
467 denotes plasmid DNA. G1 = Generation 1, MT= *Amh-IRES2-Egfp* Transgenic

468 **b)** Southern Blot analysis of genomic DNA isolated from tail biopsy of *Amh-IRES2-Egfp*  
469 transgenic mice, showing integration of transgene in multiple sites. wt1 and wt2 denote gDNA  
470 isolated from two different wild type animals. Tg1, Tg2, and Tg denotes gDNA isolated from  
471 three different transgenic animals. L denotes 1kb DNA ladder (NEB, USA).

472 **c)** GFP expression in Sertoli cells of 5 days old *Amh-IRES2-Egfp* transgenic mice (i, ii)  
473 compared with the wild type control. Yellow arrow head shows the EGFP fluorescence in the

474 Sertoli cells inside seminiferous tubules. White Arrow marks the nonspecific staining in Leydig  
475 Cells. Scale bar: 10 $\mu$ m.

476 **d)** Detection of GFP protein (~28 kDa band) by Western blot analysis from testis of 5 days old  
477 three transgenic mice compared with age matched wild-type mice testis.  $\beta$ -actin was used as  
478 loading control.

479

#### 480 **Fig. 4. Evaluation of Fetuin-A knockdown in mice**

481 **a)** Slot blot analysis of the progeny from generation one (G1) obtained from the fore founder  
482 males transfected with *Fetuin- A* shRNA. FT - denotes *Fetuin- A* shRNA expressing transgenic  
483 mice. Wt – denotes wild type mice.

484 **b)** Relative fold changes in Fetuin-A mRNA expression of transgenic animals relative to wild  
485 type animals. wt =wild type mice, F10- F15 represents five different transgenic animals. Each  
486 bar generated from n=3 qRTPCR of same sample, represented as mean  $\pm$  SEM. \*\*\* P<0.001.

487 **c)** Von kossa staining for detection of increased calcium deposition (black spots) in Fetuin A  
488 knockdown mice. **i)**, **ii)** cross section of liver; **iii)**, **iv)** cross section of heart.

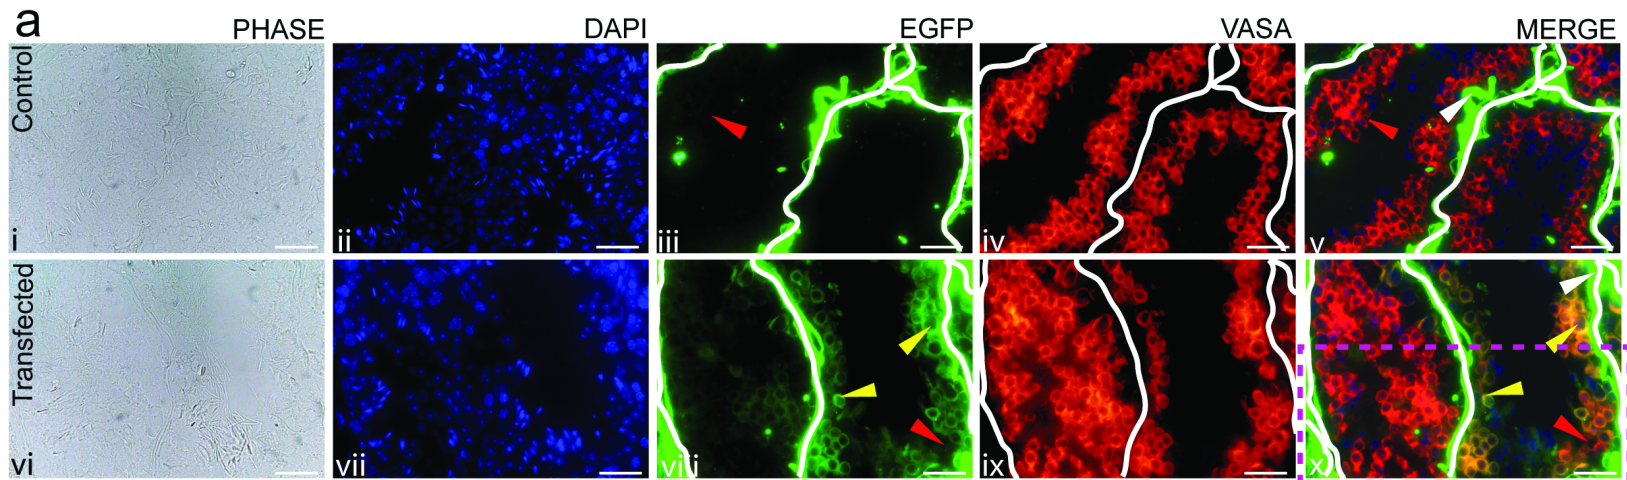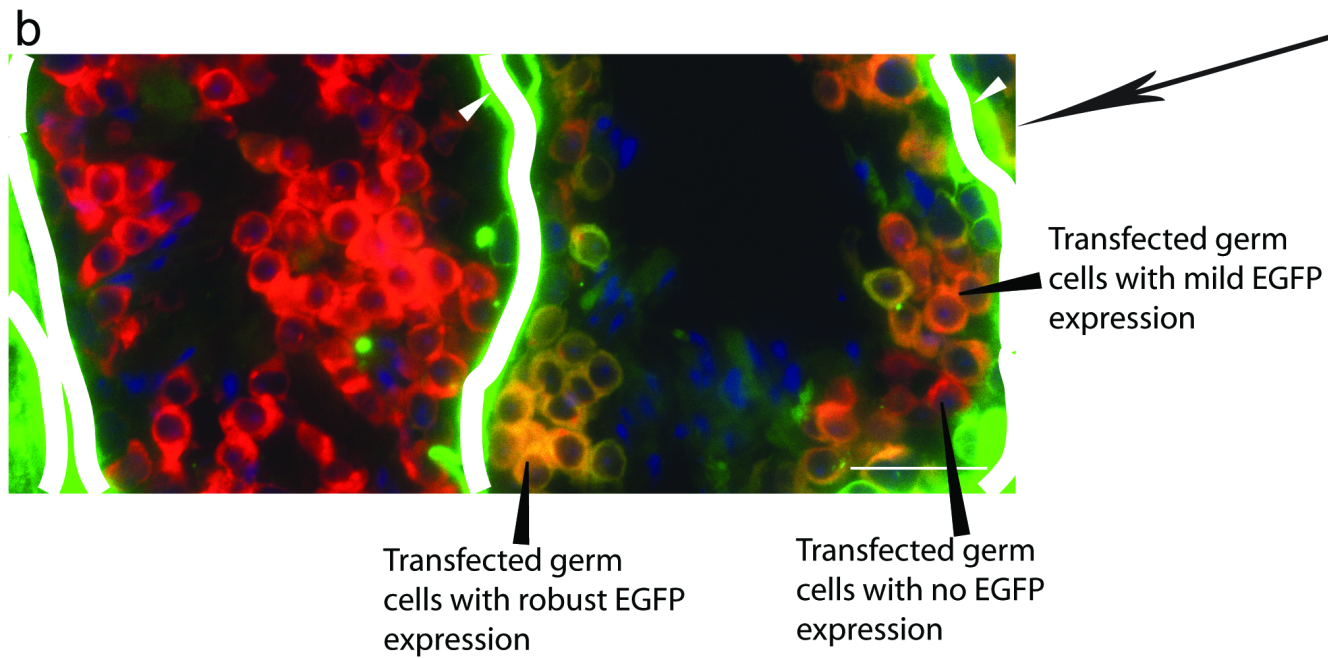

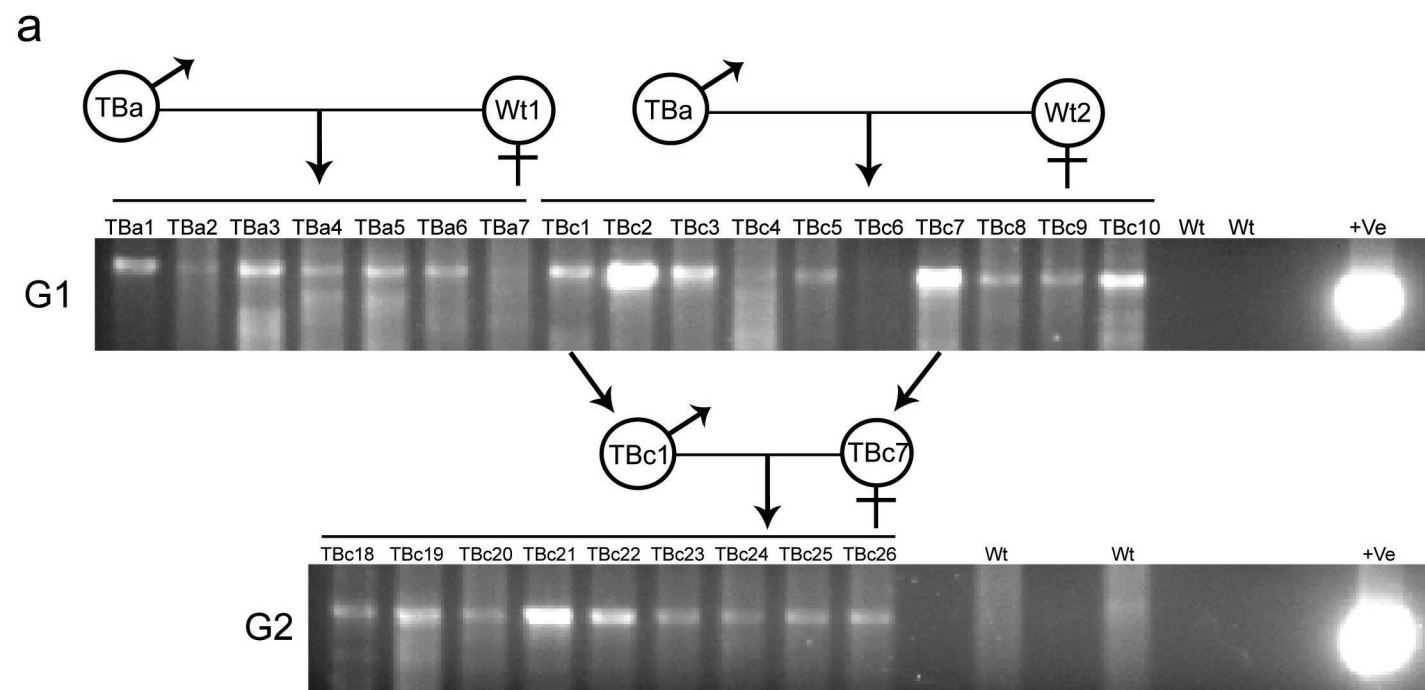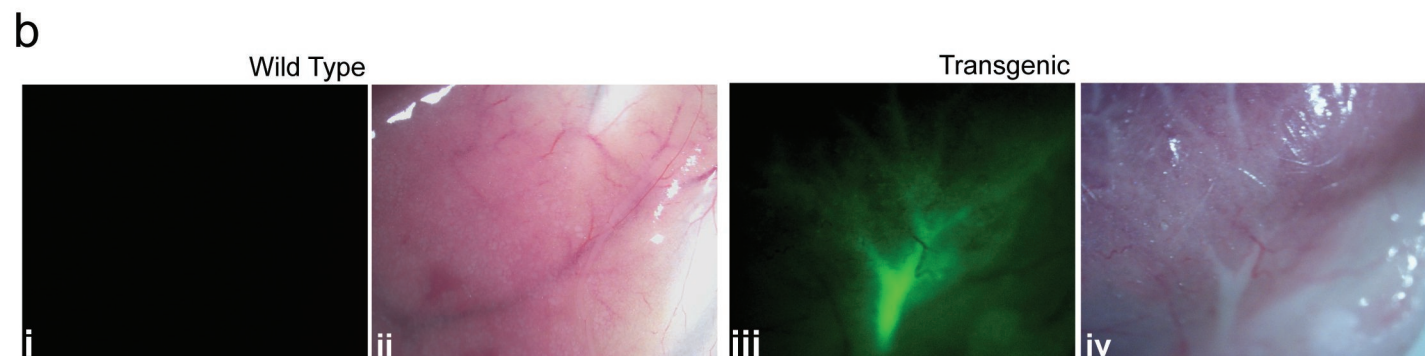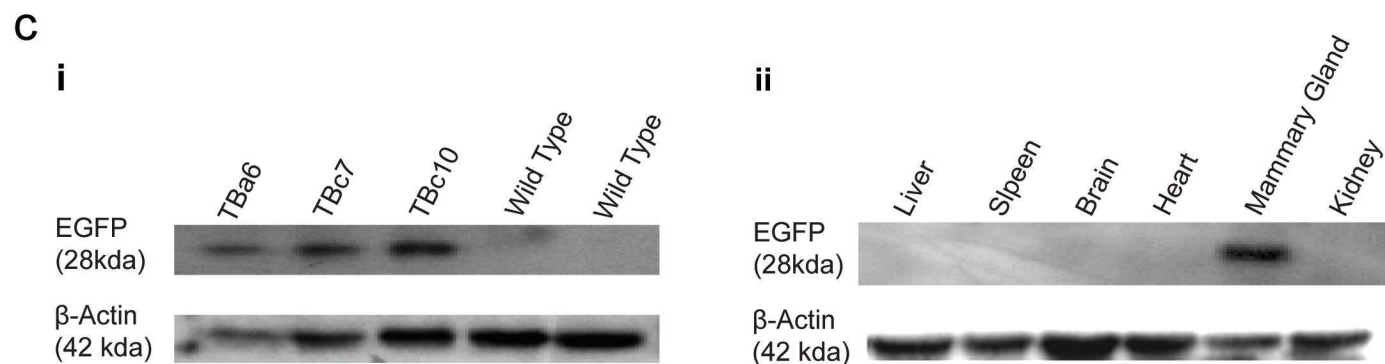

a

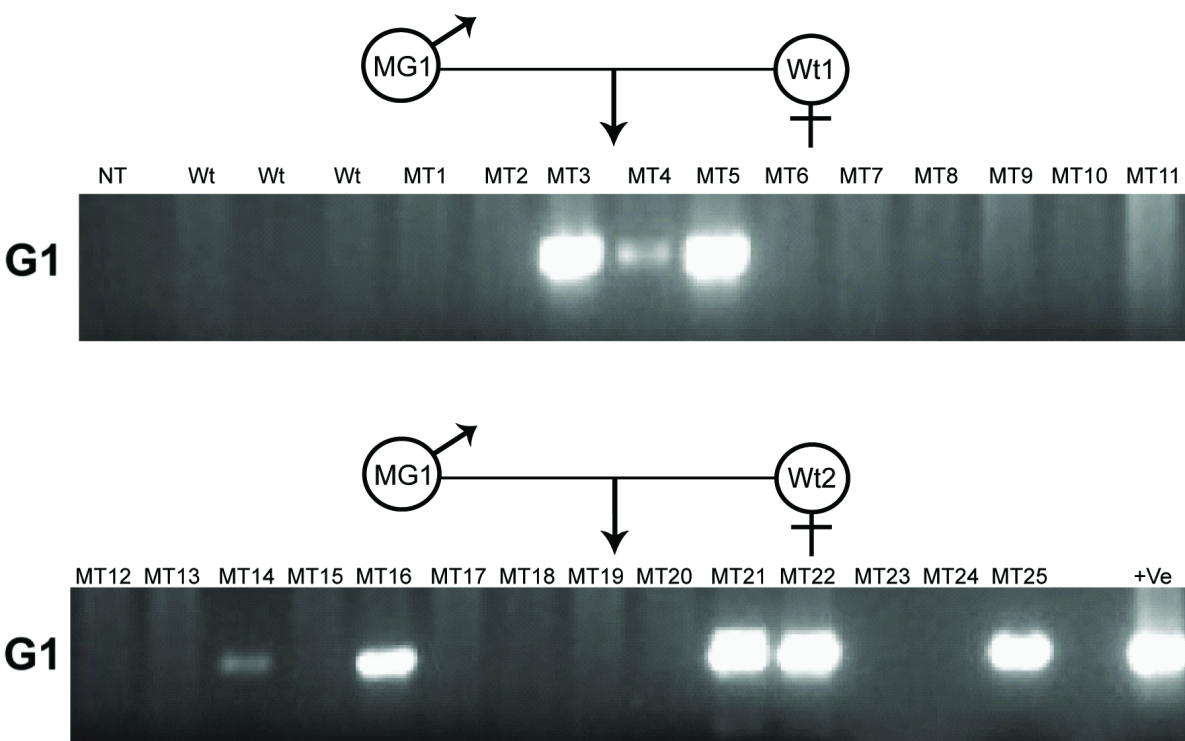

b

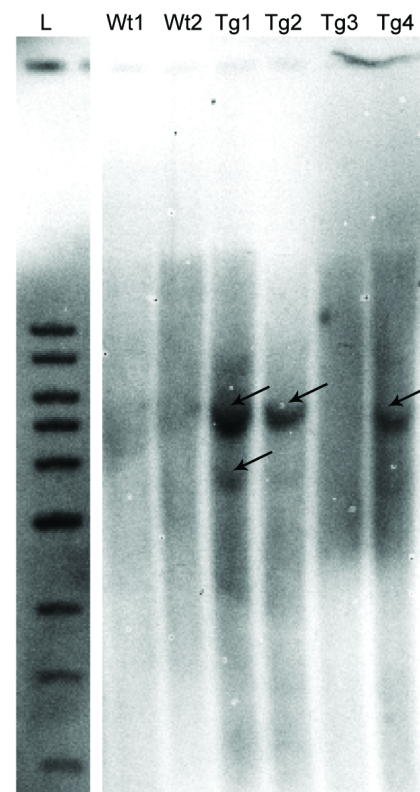

c

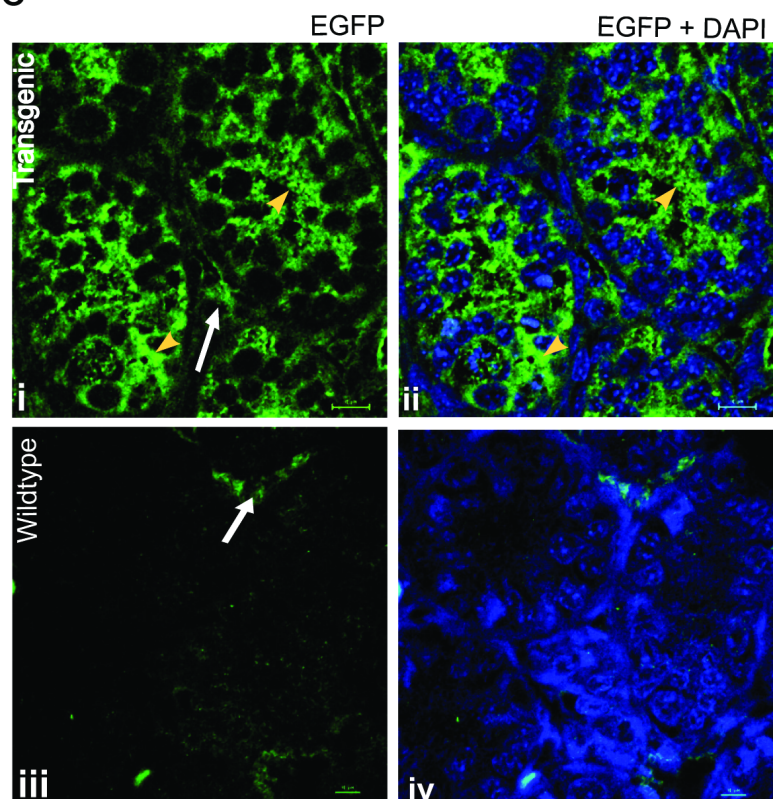

d

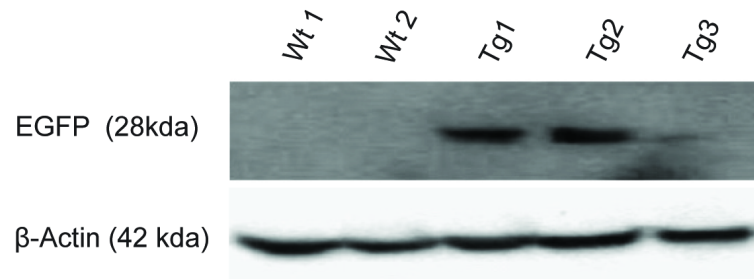



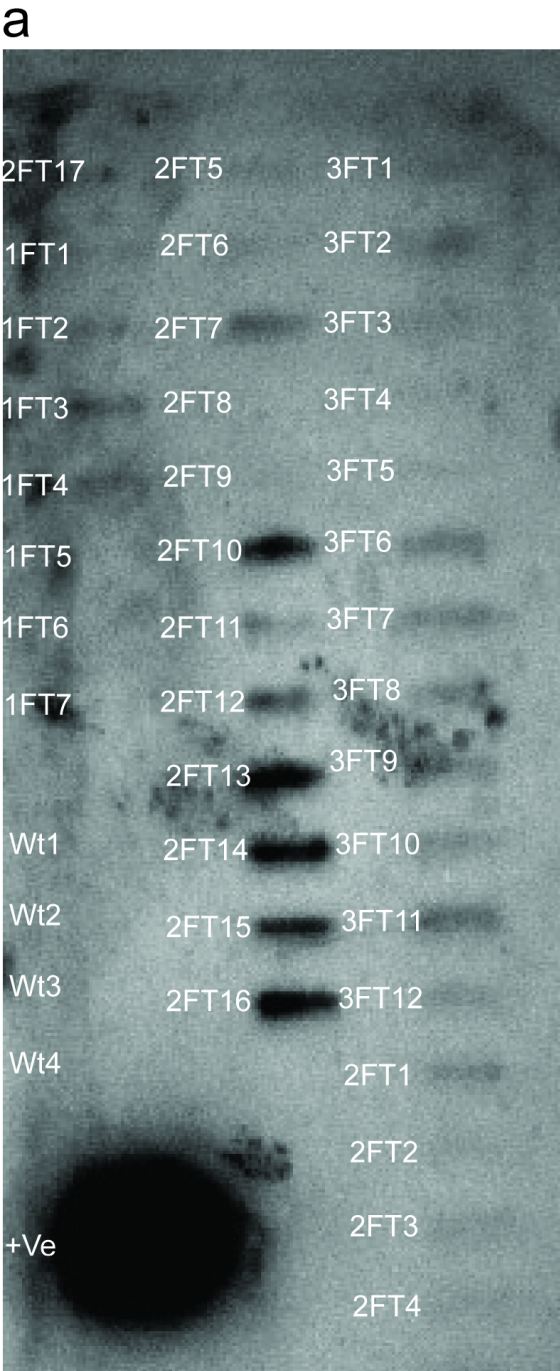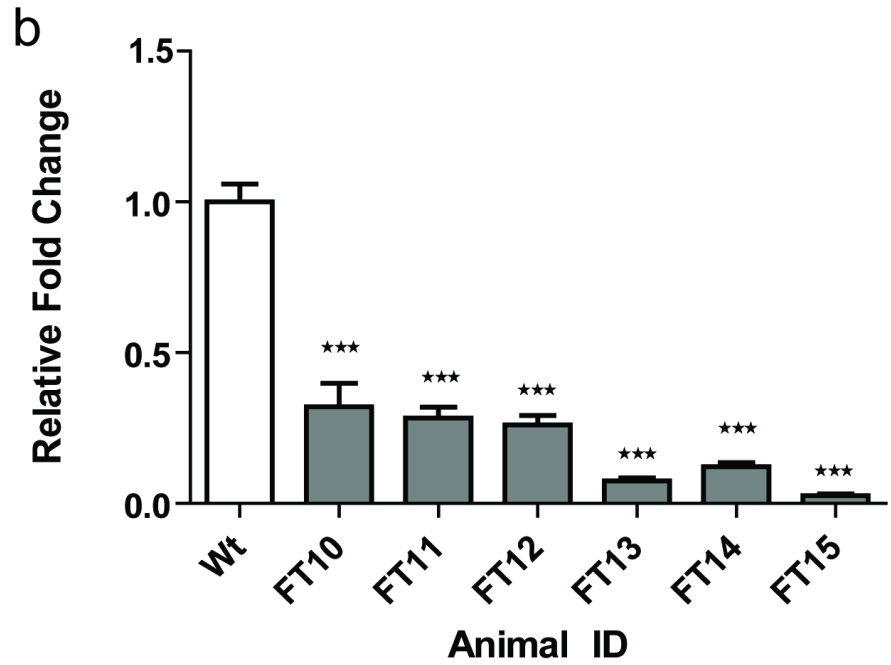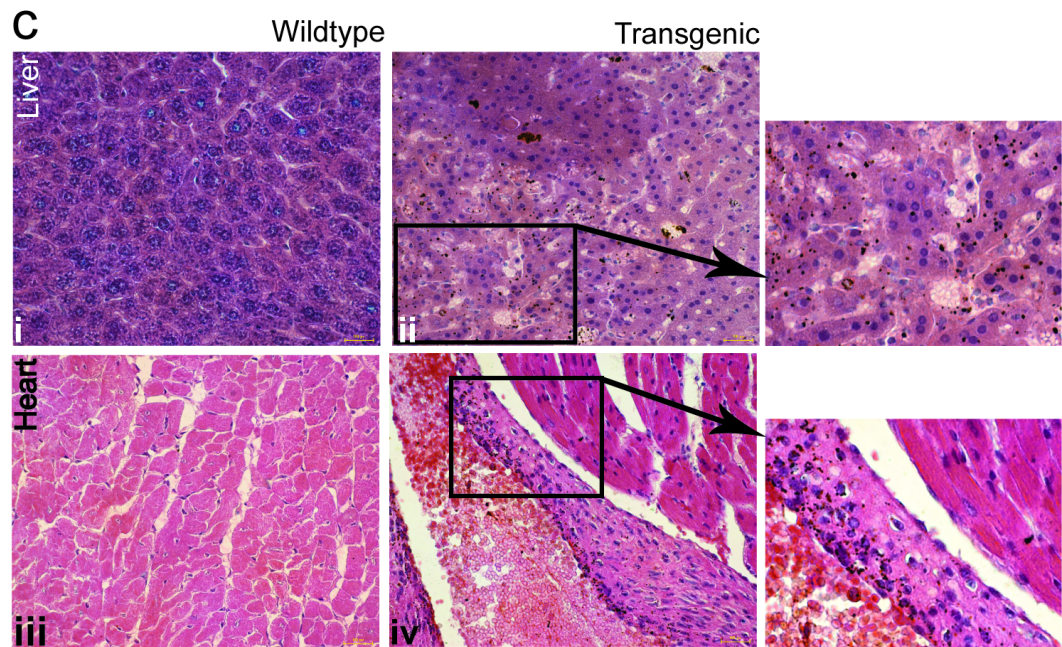

Source: http://biorxiv.org/content/10.1101/049239v2.full.pdf
